# Supplementary material for: Solution-based in situ deposition of Sb2S3 from a single source precursor for resistive random-access memory devices
Source: Royal Society of Chemistry journal article supplement (doi:10.1039/d3ma00205e), 2023-01-01
Supplement: d3ma00205e1.pdf [file d3ma00205e1.pdf]

Electronic Supplementary Information for:

**Solution-based *in-situ* deposition of  $\text{Sb}_2\text{S}_3$  from a single source precursor for resistive random-access memory devices**

Sayali Shrishail Harke,<sup>a</sup> Tongjun Zhang,<sup>b</sup> Ruomeng Huang,<sup>b</sup> Chitra Gurnani<sup>\*a</sup>

a. Ecole Centrale, School of Engineering, Mahindra University (MU), Hyderabad, India;  
email: [chitra.gurnani@mahindrauniversity.edu.in](mailto:chitra.gurnani@mahindrauniversity.edu.in)

b. School of Electronics and Computer Science, University of Southampton, Southampton  
SO17 1BJ, UK.

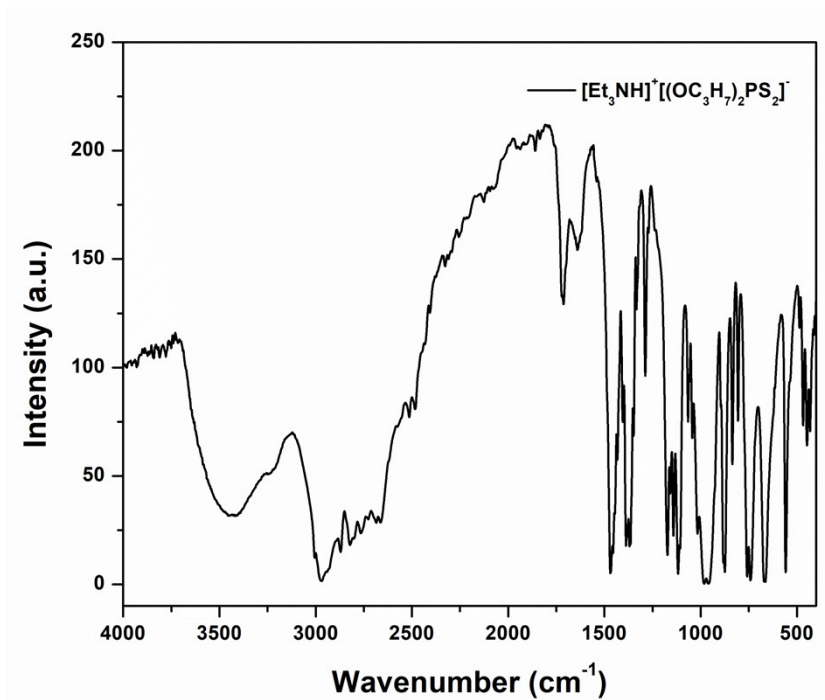

**Figure S1.** FT-IR spectrum of the  $[\text{Et}_3\text{NH}]^+ [(\text{OC}_3\text{H}_7)_2\text{S}_2\text{P}]^-$  ligand using KBr discs

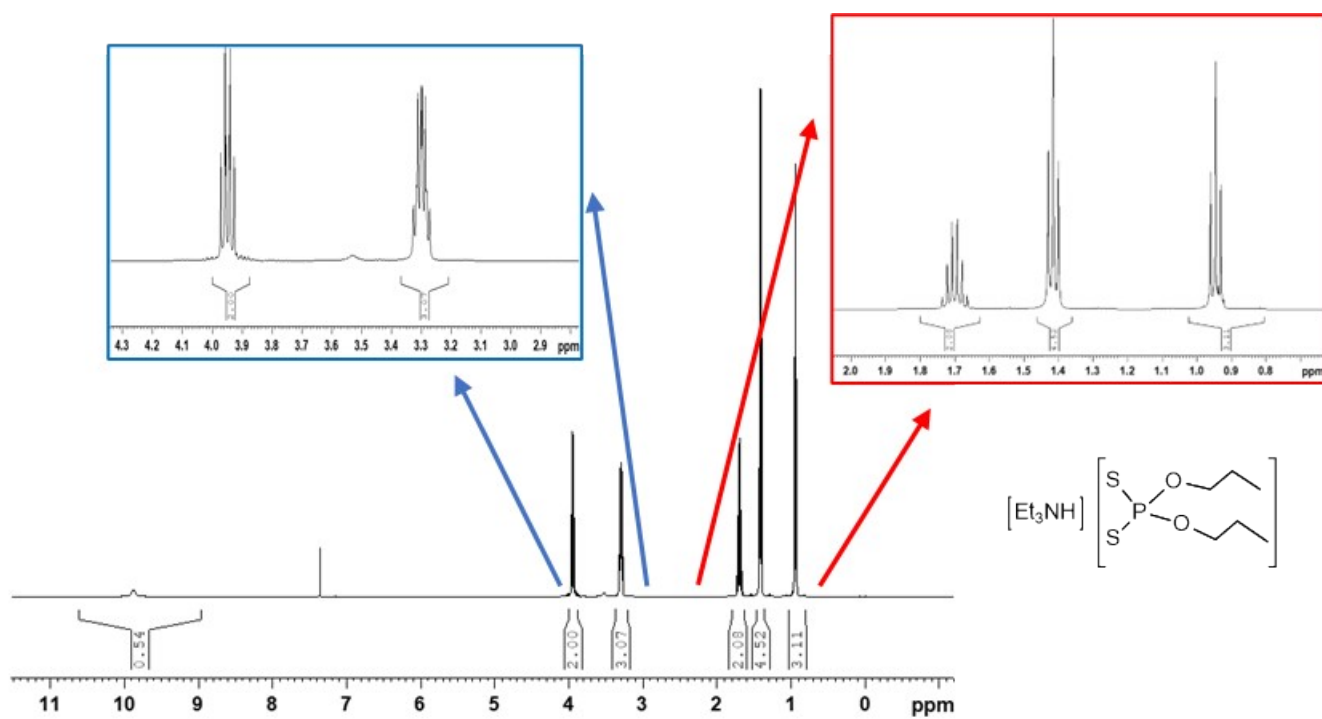

**Figure S2.** Room temperature  $\{^1\text{H}\}$  NMR spectrum of  $[\text{Et}_3\text{NH}]^+ [(\text{OC}_3\text{H}_7)_2\text{S}_2\text{P}]^-$  ligand (in  $\text{CDCl}_3$ ).

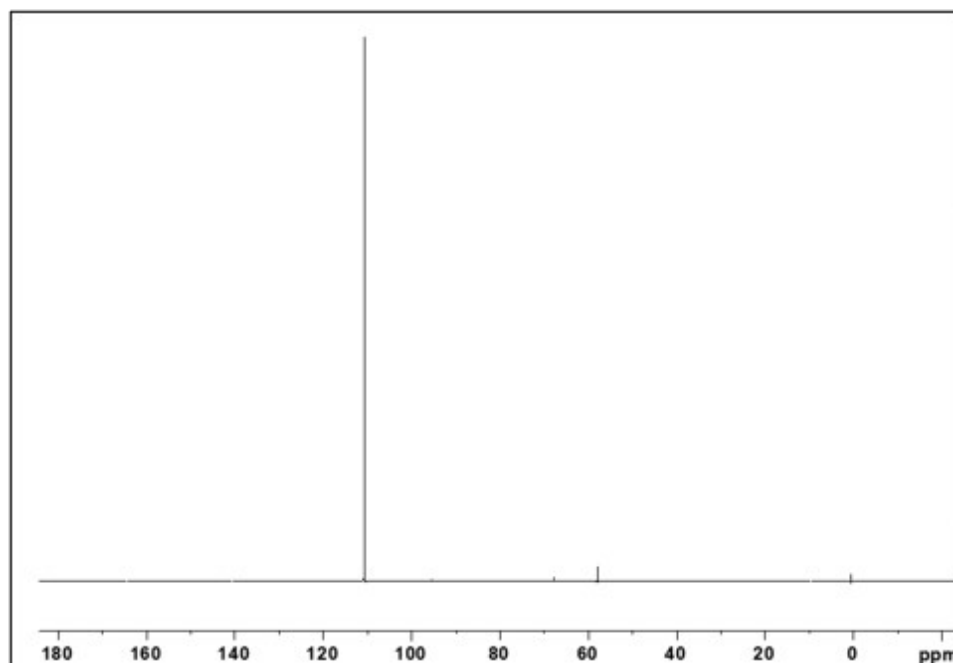

**Figure S3.** Room temperature  $^{31}\text{P}\{^1\text{H}\}$  NMR spectrum of  $[\text{Et}_3\text{NH}]^+ [(\text{OC}_3\text{H}_7)_2\text{S}_2\text{P}]^-$  ligand (in  $\text{CDCl}_3$ ).

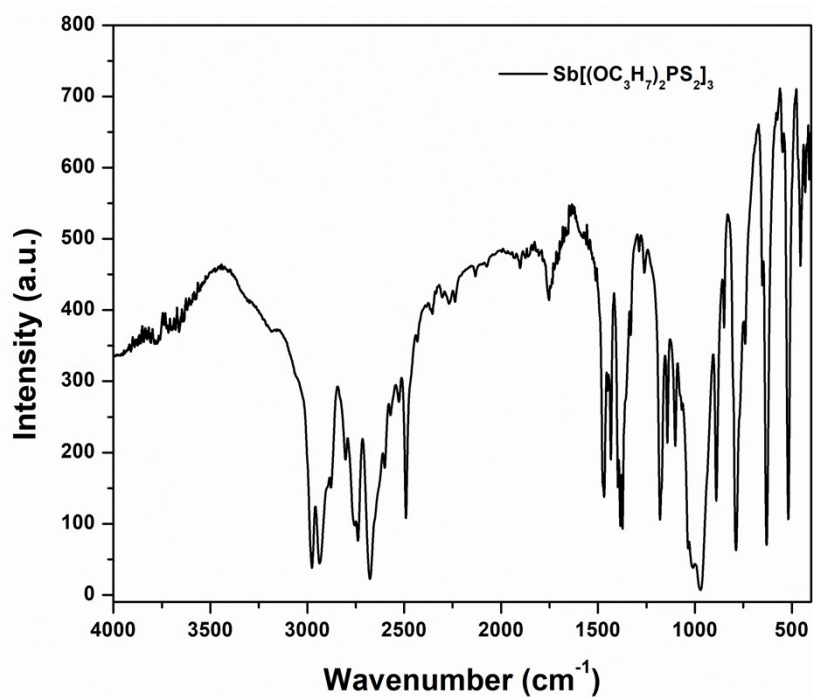

**Figure S4.** FT-IR spectrum of the  $Sb[(OC_3H_7)_2S_2P]_3$  complex using KBr discs

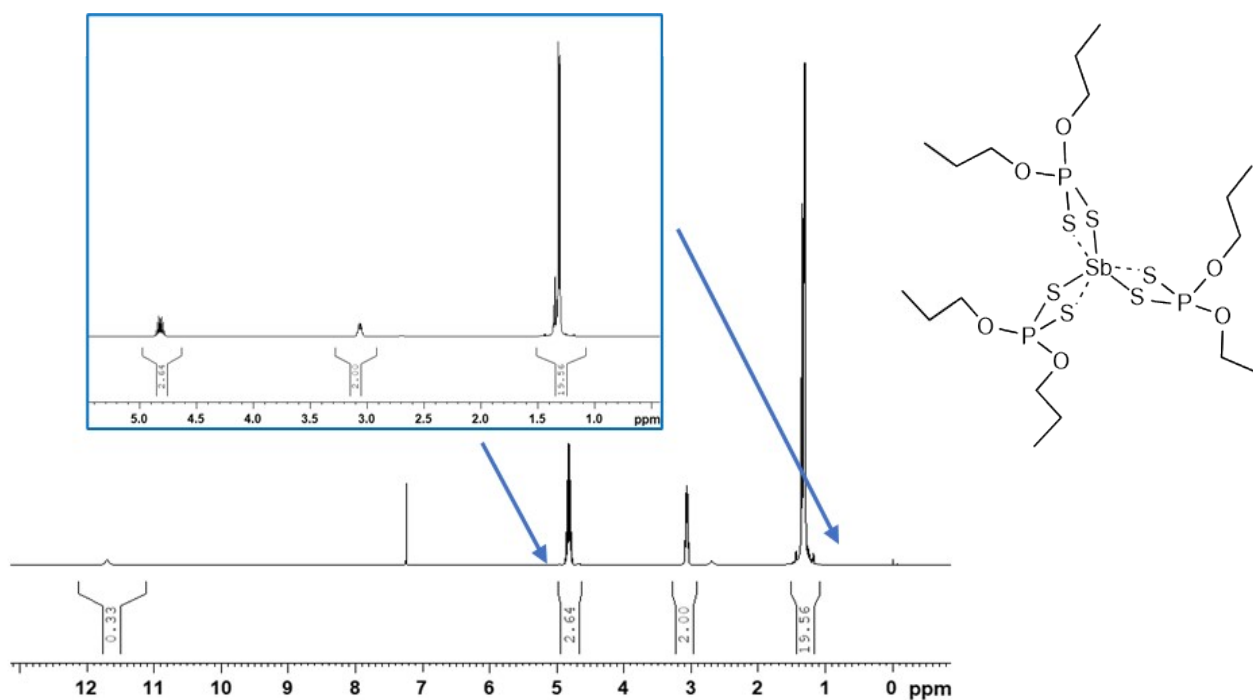

**Figure S5.** Room temperature  $\{^1H\}$  NMR spectrum of  $Sb[(OC_3H_7)_2S_2P]_3$  complex (in  $CDCl_3$ ).



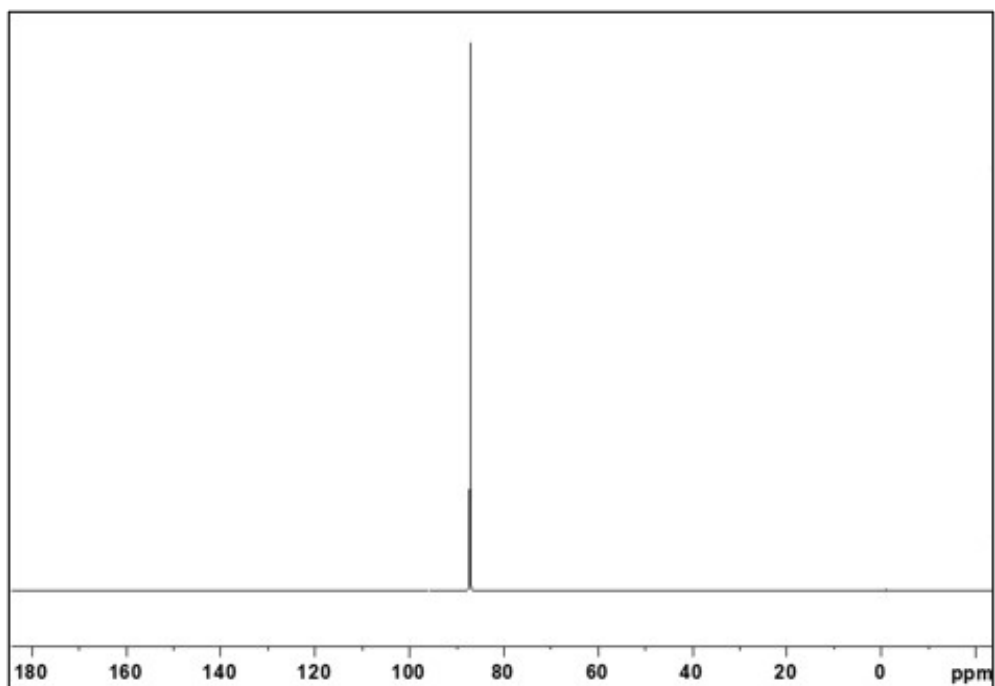

**Figure S6.** Room temperature  $^{31}\text{P}\{^1\text{H}\}$  NMR spectrum of  $\text{Sb}[(\text{OC}_3\text{H}_7)_2\text{S}_2\text{P}]_3$  complex (in  $\text{CDCl}_3$ ).

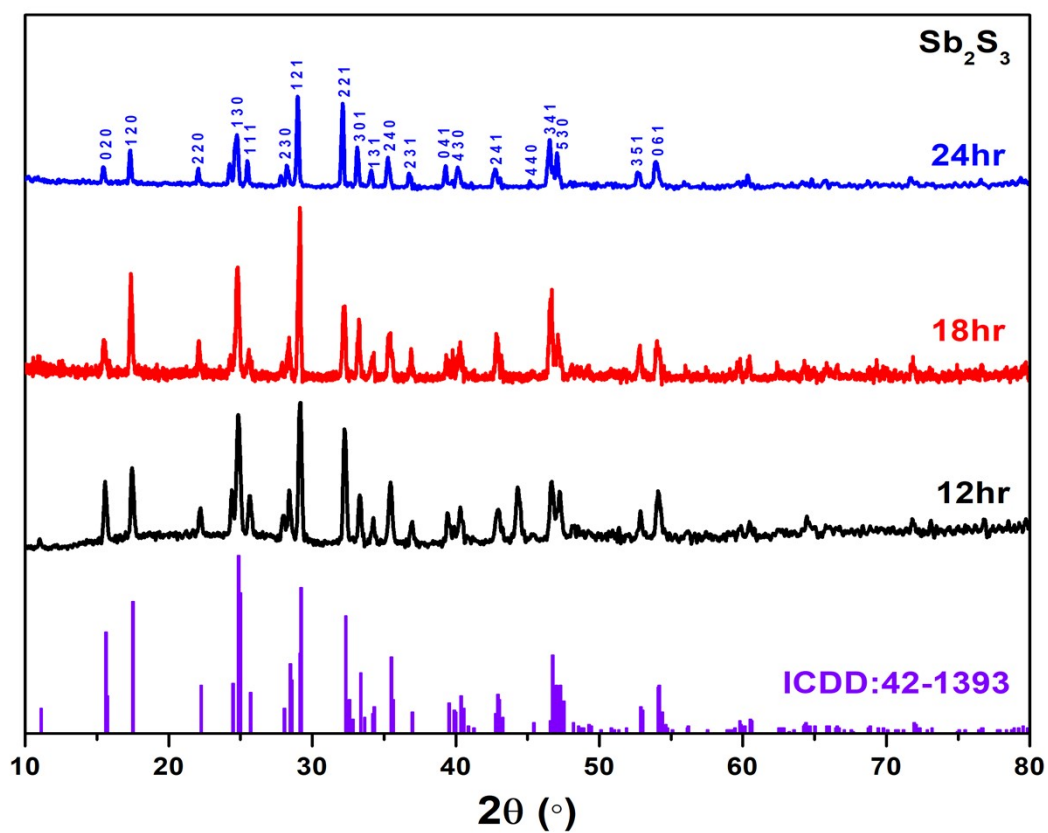

**Figure S7.** XRD spectrum of the as-deposited  $\text{Sb}_2\text{S}_3$  on FTO at various reaction times using  $\text{Sb}[(\text{OC}_3\text{H}_7)_2\text{S}_2\text{P}]_3$  as SSP

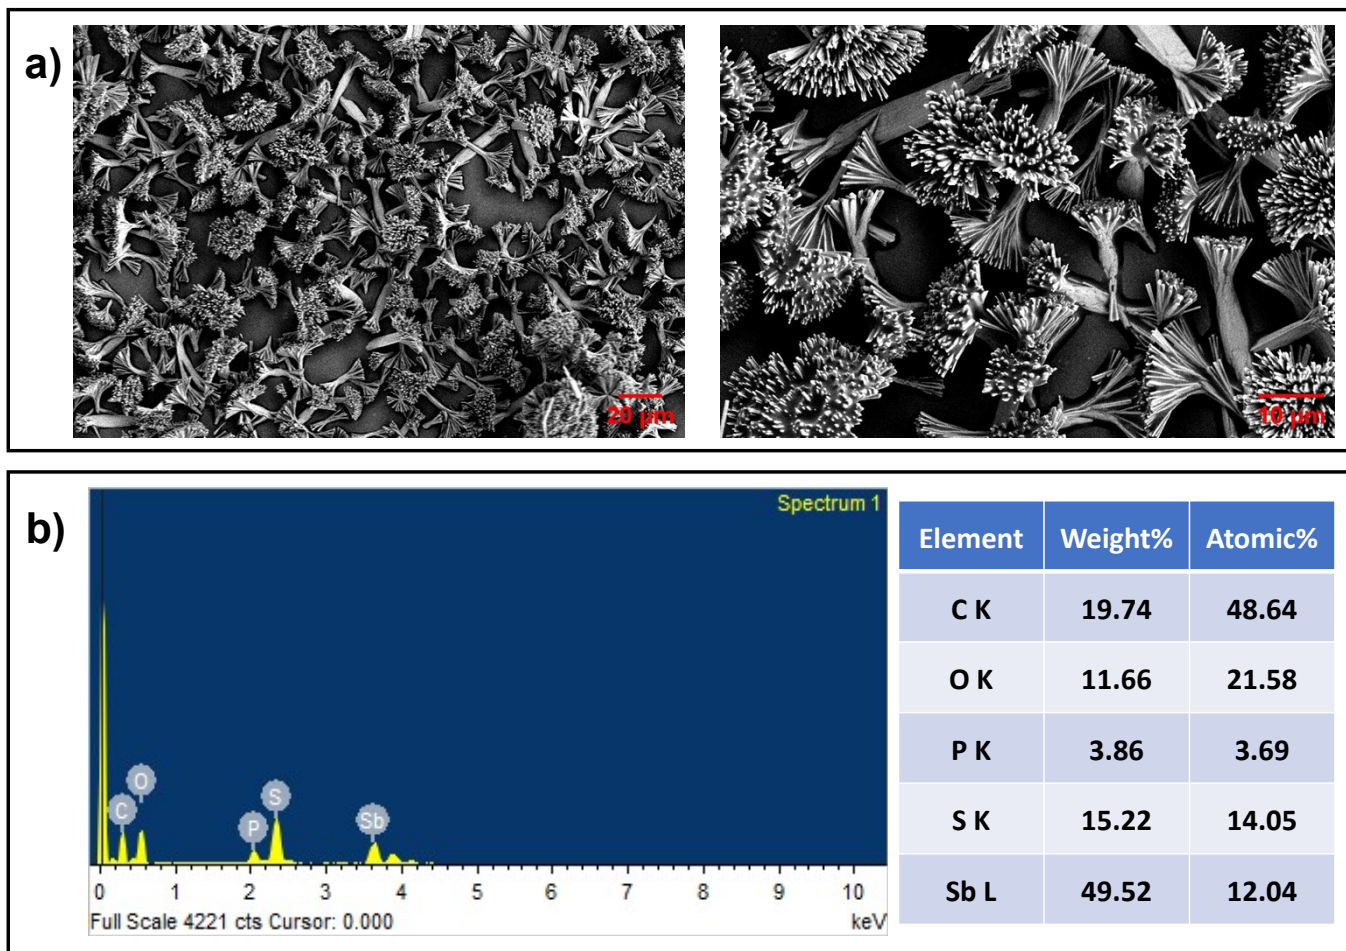

**Figure S8.** a) SEM micrograph b) EDX elemental mapping c) EDX spectrum with percentage of elements of deposited  $\text{Sb}_2\text{S}_3$  film on FTO at a reaction time of 12hr

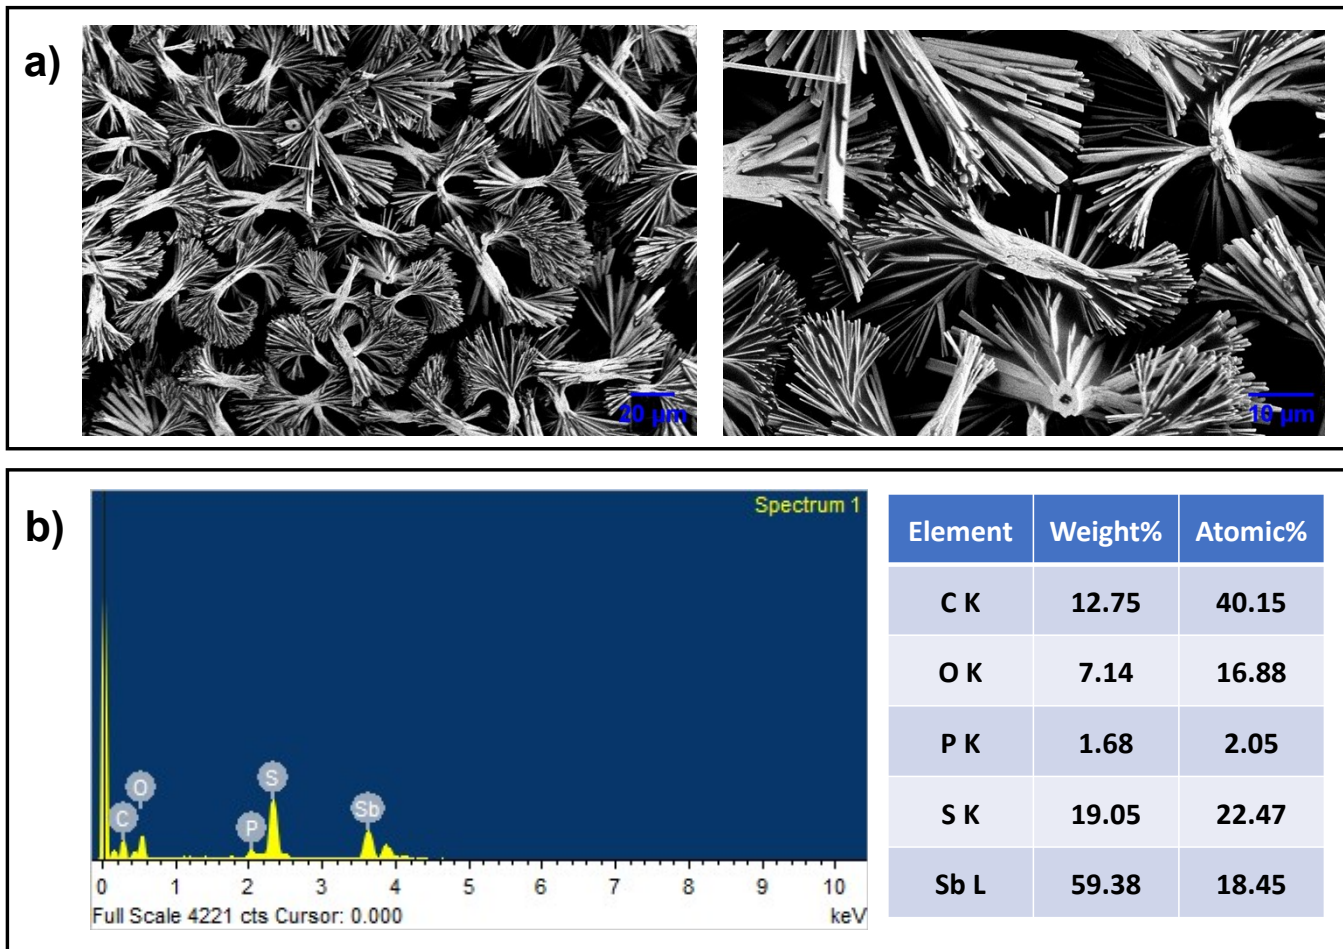

**Figure S9.** a) SEM micrograph b) EDX elemental mapping c) EDX spectrum with percentage of elements of deposited  $\text{Sb}_2\text{S}_3$  film on FTO at a reaction time of 18hr

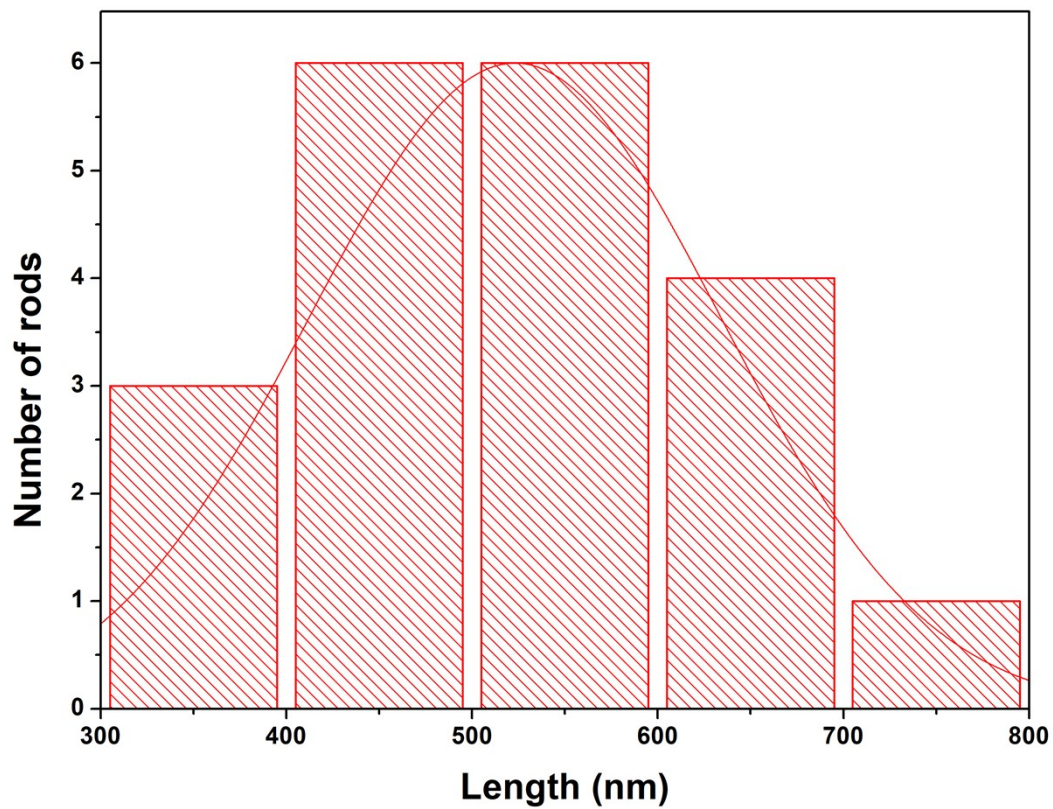

**Figure S10.** Size distribution histogram of  $\text{Sb}_2\text{S}_3$

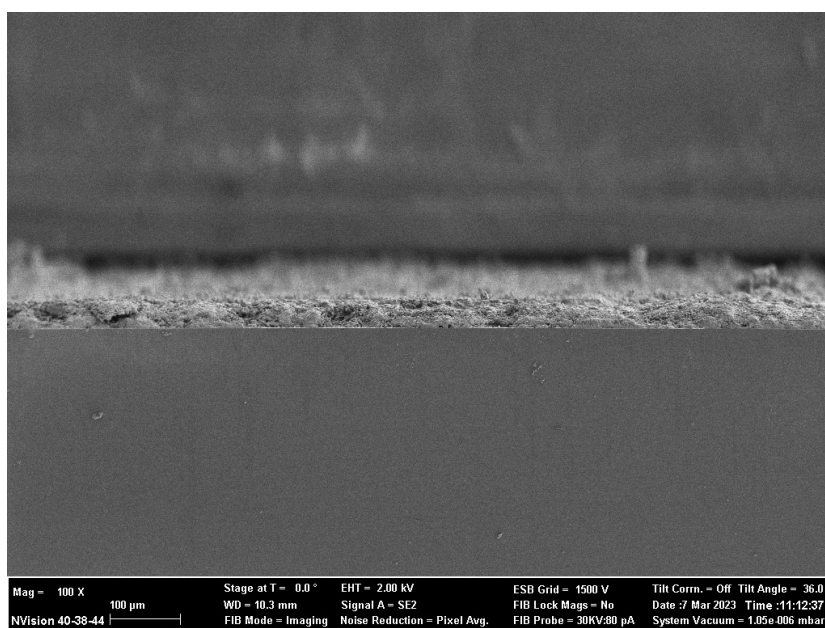

**Figure S11.** Cross-section image of deposited  $\text{Sb}_2\text{S}_3$  on FTO



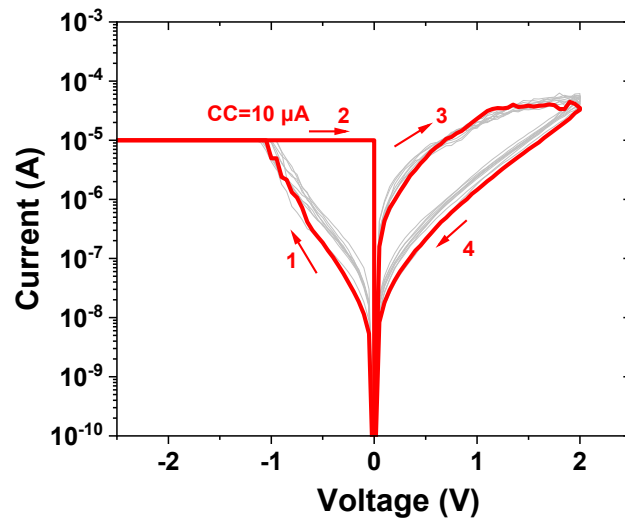

**Figure S12.** Bipolar non-volatile resistive switching behaviours of the W/Sb<sub>2</sub>S<sub>3</sub>/FTO
